# Supplementary material for: Structural and Sequence Analysis of Imelysin-Like Proteins Implicated in Bacterial Iron Uptake
Source: PubMed Central journal article supplement (PMC3143127; doi:10.1371/journal.pone.0021875), 2011-07-25
Supplement: pone.0021875.s004.pdf [file pone.0021875.s004.pdf]

## Supporting Information

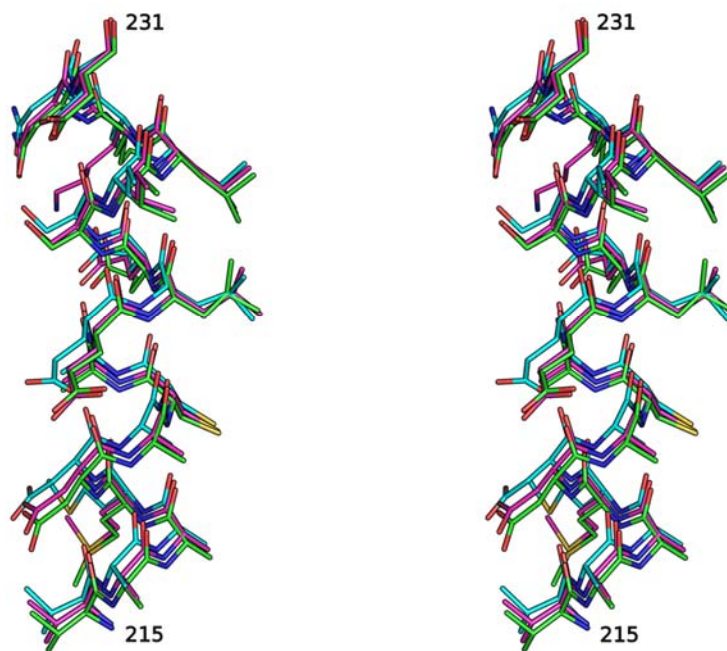

Fig. S4
